# Supplementary figures and images for: Prognostic Significance of ROR2 Expression in Patients with Urothelial Carcinoma
Source: MDPI journal article supplement (doi:10.3390/biomedicines9081054), 2021-08-20

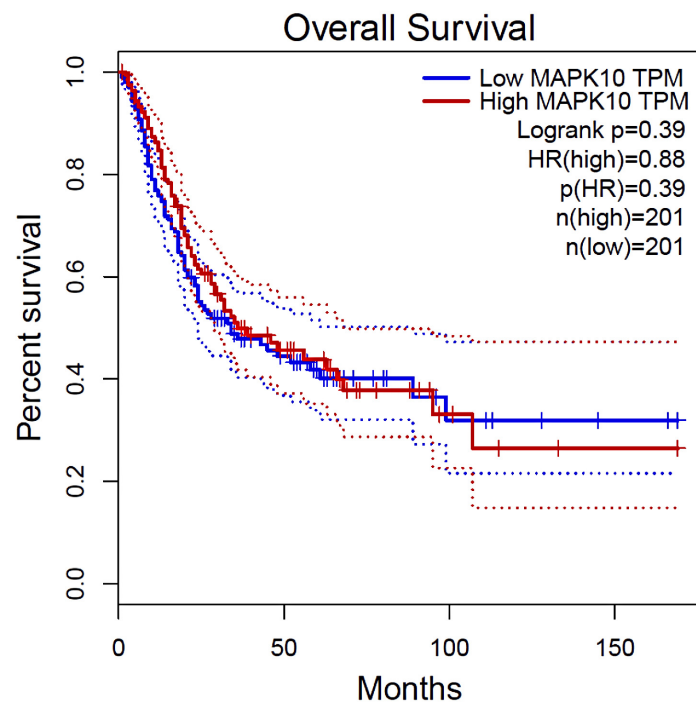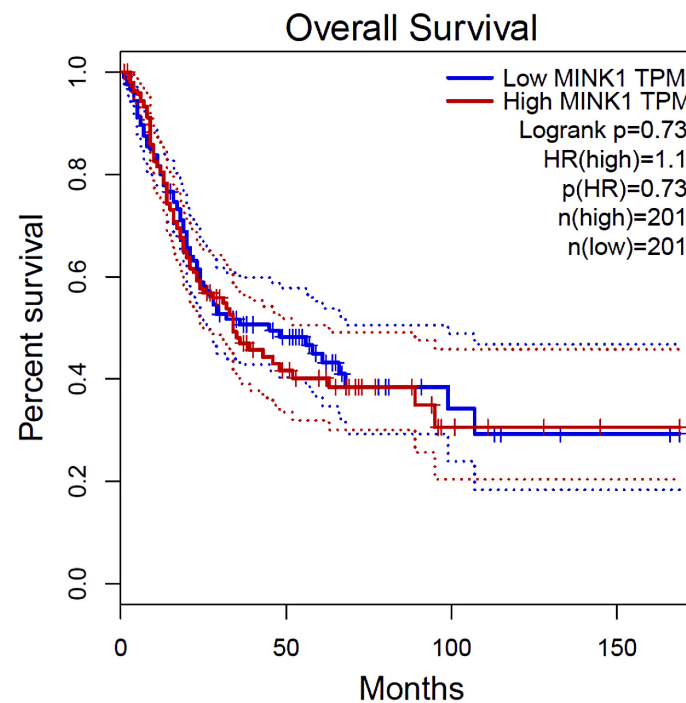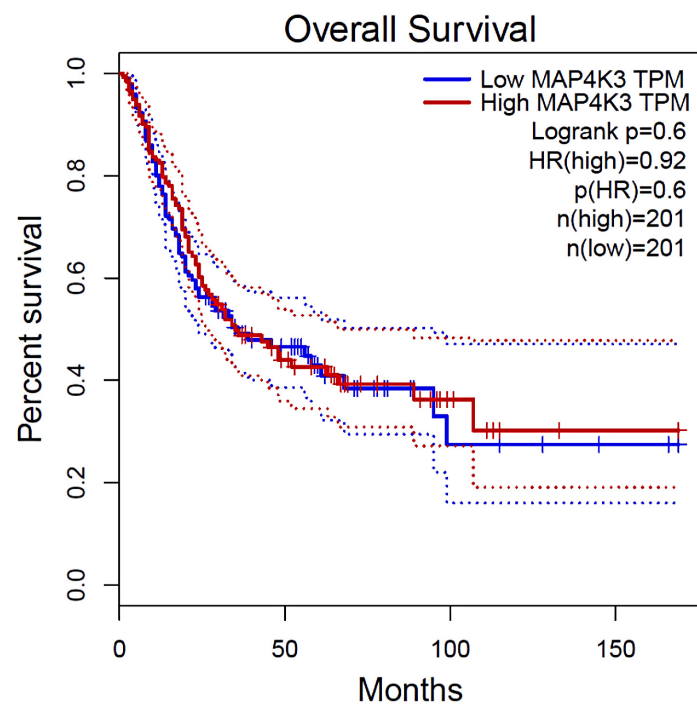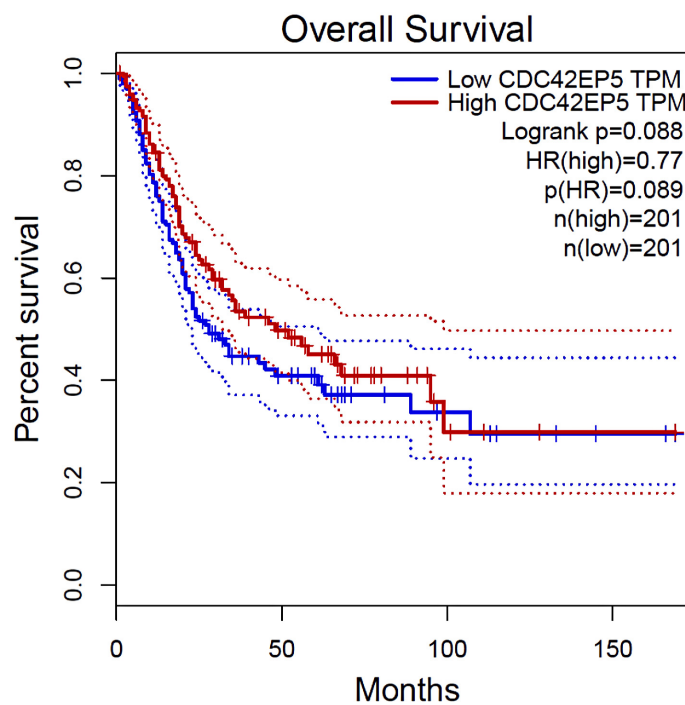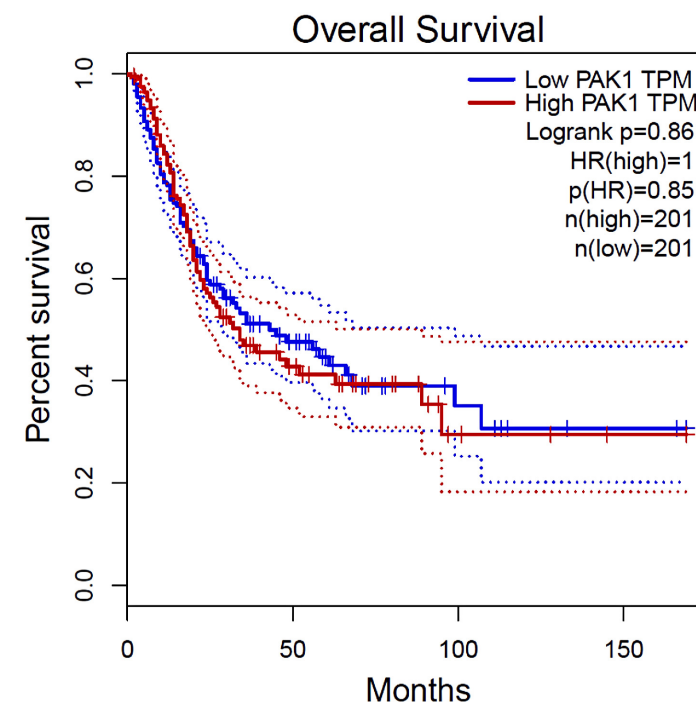

Supplement: s1 [file s1]

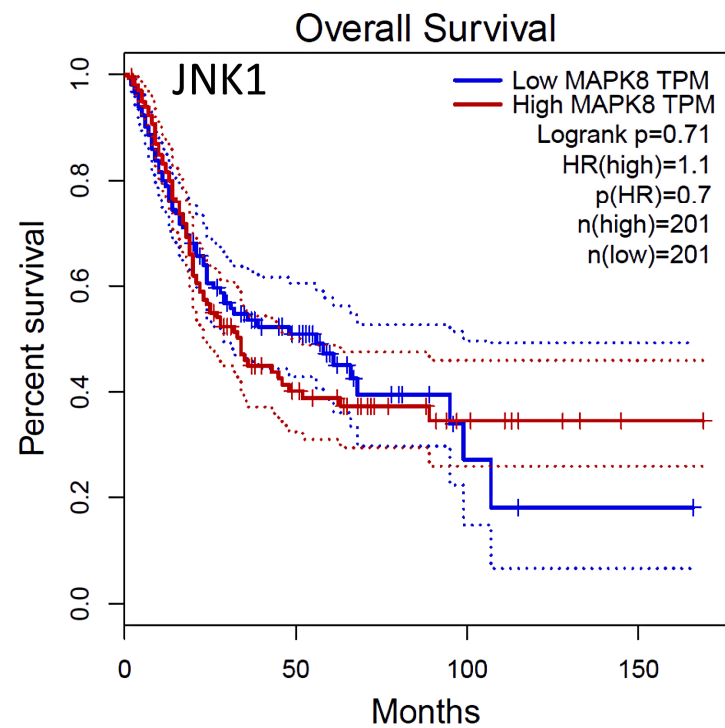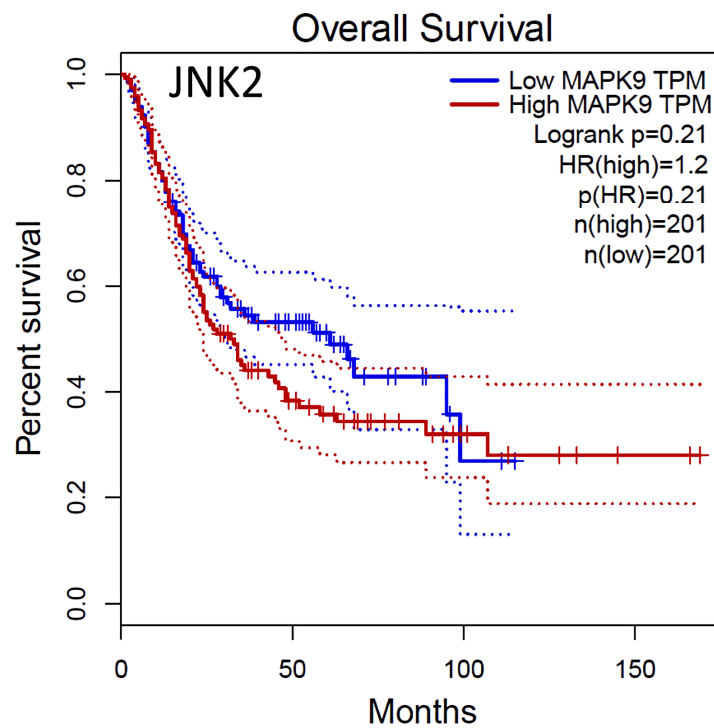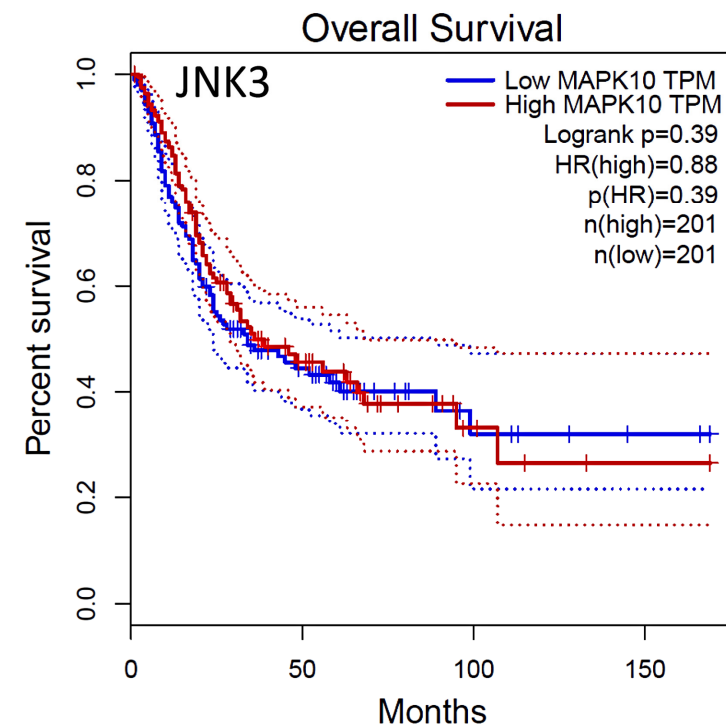

Supplement: s1 [file s1]
